# Supplementary material for: Decrease in particle size and enhancement of upconversion emission through Y3+ions doping in hexagonal NaLuF4:Yb3+/Er3+nanocrystals
Source: Royal Society of Chemistry journal article supplement (doi:10.1039/c5ce00294j), 2015-01-01
Supplement: c5ce00294j1.pdf [file c5ce00294j1.pdf]

## Supplementary Information

### **Decrease in particle size and enhancement of upconversion emission through Y<sup>3+</sup> ions doping in hexagonal NaLuF<sub>4</sub>:Yb<sup>3+</sup>/Er<sup>3+</sup> nanocrystals**

Guotao Xiang <sup>1,2</sup>, Jiahua Zhang <sup>1</sup>, Zhendong Hao <sup>1</sup>, Xia Zhang <sup>1</sup>, Guohui Pan <sup>1</sup>,  
Yongshi Luo <sup>1</sup> and Haifeng Zhao <sup>1</sup>

<sup>1</sup> *State Key Laboratory of Luminescence and Applications, Changchun Institute of Optics, Fine Mechanics and Physics, Chinese Academy of Sciences, 3888 Eastern South Lake Road, Changchun 130033, China*

<sup>2</sup> *Graduate School of Chinese Academy of Sciences, Beijing, 100039, China*

E-mail: [zhangjh@ciomp.ac.cn](mailto:zhangjh@ciomp.ac.cn)

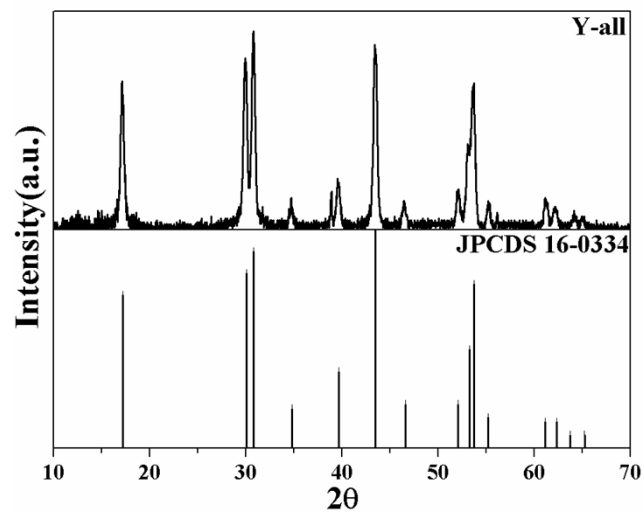

Fig. S1 The standard XRD data of  $\beta$ -NaYF<sub>4</sub> (JCPDS 16-0334) and the XRD patterns of Y-all.

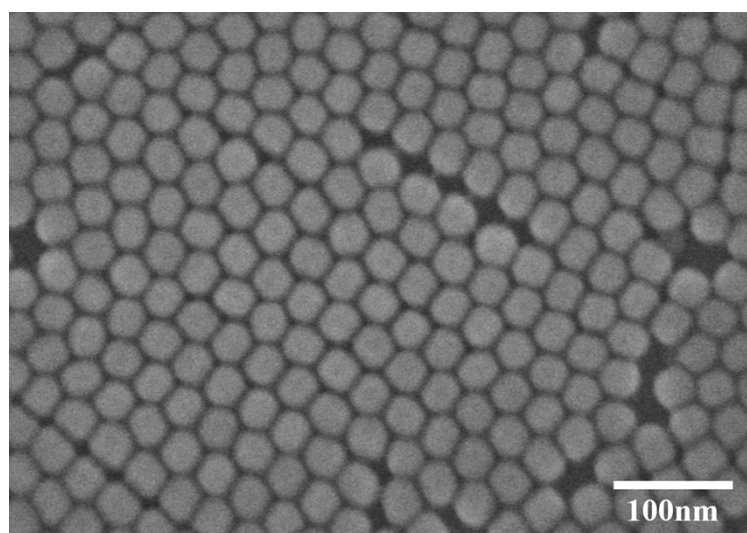

Fig. S2 The SEM image of Y-all.

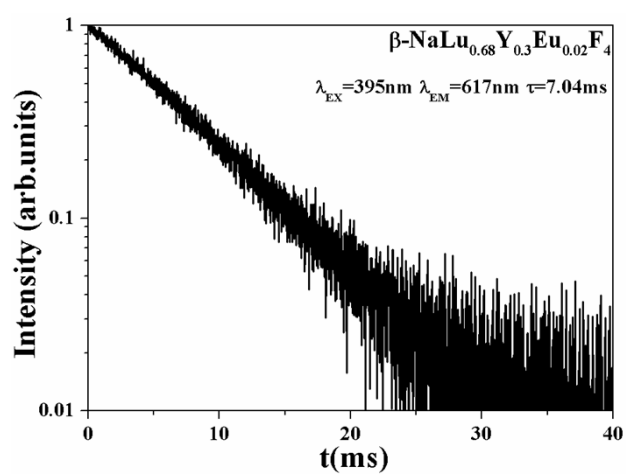

Fig. S3 The decay curve for  $\text{Eu}^{3+}: {}^5\text{D}_0$  level of  $\beta\text{-NaLu}_{0.68}\text{Y}_{0.3}\text{Eu}_{0.02}\text{F}_4$ .
